# Supplementary material for: Interactions between native and invasive species: A systematic review of the red squirrel-gray squirrel paradigm
Source: Frontiers journal article supplement (doi:10.3389/fevo.2023.1083008), 2023-03-31
Supplement: Table_1.XLSX [file Table_1.XLSX]

## Sheet: final list of papers
Authors	Year	Title	Journal	number	first page	last page	doi
Ball S.J., Daszak P., Sainsbury A.W., Snow K.R.	2014	Coccidian parasites of red squirrels (Sciurus vulgaris) and grey squirrels (Sciurus carolinensis) in England	Journal of Natural History	48	1225	1230	10.1080/00222933.2013.867376
Ballingall, KT; McIntyre, A; Lin, ZZ; Timmerman, N; Matthysen, E; Lurz, PW; Melville, L; Wallace, A; Meredith, AL; Romeo, C; Wauters, LA; Sainsbury, AW; McInnes, CJ	2016	Limited diversity associated with duplicated class II MHC-DRB genes in the red squirrel population in the United Kingdom compared with continental Europe	CONSERVATION GENETICS	17	1171	1182	10.1007/s10592-016-0852-3
Barbara, F; La Morgia, V; Parodi, V; Toscano, G; Venturino, E	2018	Analysis of the Incidence of Poxvirus on the Dynamics between Red and Grey Squirrels	MATHEMATICS	6			10.3390/math6070113
Bell, SS; White, A; Sherratt, JA; Boots, M	2009	Invading with biological weapons: the role of shared disease in ecological invasion	THEORETICAL ECOLOGY	2	53	66	10.1007/s12080-008-0029-x
Bertolino, S	2008	Introduction of the American grey squirrel (Sciurus carolinensis) in Europe: a case study in biological invasion	CURRENT SCIENCE	95	903	906
Bertolino, S; Currado, I; Mazzogluio, P; Amori, G	2000	Native and alien squirrels in Italy.	HYSTRIX-ITALIAN JOURNAL OF MAMMALOGY	11	49	58	10.4404/hystrix-11.2-4150
Bertolino, S; di Montezemolo, NC; Preatoni, DG; Wauters, LA; Martinoli, A	2014	A grey future for Europe: Sciurus carolinensis is replacing native red squirrels in Italy	BIOLOGICAL INVASIONS	16	53	62	10.1007/s10530-013-0502-3
Bertolino, S; Lurz, PWW; Sanderson, R; Rushton, SR	2008	Predicting the spread of the American grey squirrel (Sciurus carolinensis) in Europe: A call for a co-ordinated European approach	BIOLOGICAL CONSERVATION	141	2564	2575	10.1016/j.biocon.2008.07.017
Bruemmer, CM; Rushton, SP; Gurnell, J; Lurz, PWW; Nettleton, P; Sainsbury, AW; Duff, JP; Gilray, J; McInnes, CJ	2010	Epidemiology of squirrelpox virus in grey squirrels in the UK	EPIDEMIOLOGY AND INFECTION	138	941	950	10.1017/S0950268810000816
Bryce, J; Johnson, PJ; Macdonald, DW	2002	Can niche use in red and grey squirrels offer clues for their apparent coexistence?	JOURNAL OF APPLIED ECOLOGY	39	875	887	10.1046/j.1365-2664.2002.00765.x
Bryce, JM; Speakman, JR; Johnson, PJ; Macdonald, DW	2001	Competition between Eurasian red and introduced Eastern grey squirrels: the energetic significance of body-mass differences	PROCEEDINGS OF THE ROYAL SOCIETY B-BIOLOGICAL SCIENCES	268	1731	1736	10.1098/rspb.2001.1700
Carroll B., Russell P., Gurnell J., Nettleton P., Sainsbury A.W.	2009	Epidemics of squirrelpox virus disease in red squirrels (Sciurus vulgaris): Temporal and serological findings	Epidemiology and Infection	137	257	265	10.1017/S0950268808000836
Chantrey J., Dale T., Jones D., Begon M., Fenton A.	2019	The drivers of squirrelpox virus dynamics in its grey squirrel reservoir host	Epidemics	28			10.1016/j.epidem.2019.100352
Chantrey, J; Dale, TD; Read, JM; White, S; Whitfield, F; Jones, D; McInnes, CJ; Begon, M	2014	European red squirrel population dynamics driven by squirrelpox at a gray squirrel invasion interface	ECOLOGY AND EVOLUTION	4	3788	3799	10.1002/ece3.1216
Chow, PKY; Lurz, PWW; Lea, SEG	2018	A battle of wits? Problem-solving abilities in invasive eastern grey squirrels and native Eurasian red squirrels	ANIMAL BEHAVIOUR	137	11	20	10.1016/j.anbehav.2017.12.022
Collins, LM; Warnock, ND; Tosh, DG; McInnes, C; Everest, D; Montgomery, WI; Scantlebury, M; Marks, N; Dick, JTA; Reid, N	2014	Squirrelpox Virus: Assessing Prevalence, Transmission and Environmental Degradation	PLOS ONE	9			10.1371/journal.pone.0089521
Cox P.G., Morris P.J.R., Hennekam J.J., Kitchener A.C.	2020	Morphological and functional variation between isolated populations of British red squirrels (Sciurus vulgaris)	Journal of Zoology	312	271	283	10.1111/jzo.12829
Darby, Alistair C; McInnes, Colin J; Kjær, Karina Hansen; Wood, Ann R; Hughes, Margaret; Martensen, Pia Møller; Radford, Alan D; Hall, Neil; Chantrey, Julian;	2014	Novel host-related virulence factors are encoded by squirrelpox virus, the main causative agent of epidemic disease in red squirrels in the UK	PloS one	9	e96439		10.1371/journal.pone.0096439
Everest D.J., Shuttleworth C.M., Grierson S.S., Duff J.P., Jackson N., Litherland P., Kenward R.E., Stidworthy M.F.	2012	Systematic assessment of the impact of adenovirus infection on a captive reintroduction project for red squirrels (Sciurus vulgaris)	Veterinary Record	171	176		10.1136/vr.100617
Everest, DJ; Shuttleworth, CM; Stidworthy, MF; Grierson, SS; Duff, JP; Kenward, RE	2014	Adenovirus: an emerging factor in red squirrel Sciurus vulgaris conservation	MAMMAL REVIEW	44	225	233	10.1111/mam.12025
Fiegna C., Dagleish M.P., Coulter L., Milne E., Meredith A., Finlayson J., Di Nardo A., McInnes C.J.	2016	Host-pathogen dynamics of squirrelpox virus infection in red squirrels (Sciurus vulgaris)	Veterinary Microbiology	182	18	27	10.1016/j.vetmic.2015.10.012
Fingland K., Ward S.J., Bates A.J., Bremner-Harrison S.	2022	A systematic review into the suitability of urban refugia for the Eurasian red squirrel Sciurus vulgaris	Mammal Review	52	26	38	10.1111/mam.12264
Flaherty, Margaret; Lawton, Colin;	2019	The regional demise of a non-native invasive species: the decline of grey squirrels in Ireland	Biological Invasions	21	2401	2416	10.1007/s10530-019-01987-x
Goldstein, EA; Butler, F; Lawton, C	2015	Frontier population dynamics of an invasive squirrel species: Do introduced populations function differently than those in the native range?	BIOLOGICAL INVASIONS	17	1181	1197	10.1007/s10530-014-0787-x
Goldstein, EA; Butler, F; Lawton, C	2016	Modeling future range expansion and management strategies for an invasive squirrel species	BIOLOGICAL INVASIONS	18	1431	1450	10.1007/s10530-016-1092-7
Gosso, A; La Morgia, V; Marchisio, P; Telve, O; Venturino, E	2012	DOES A LARGER CARRYING CAPACITY FOR AN EXOTIC SPECIES ALLOW ENVIRONMENT INVASION? - SOME CONSIDERATIONS ON THE COMPETITION OF RED AND GREY SQUIRRELS	JOURNAL OF BIOLOGICAL SYSTEMS	20	221	234	10.1142/S0218339012500131
Gurnell J., Lurz P., Bertoldi W.	2014	The changing patterns in the distribution of red and grey squirrels in the North of England and Scotland between 1991 and 2010 based on volunteer surveys	Hystrix	25	83	89	10.4404/hystrix-25.2-9988
Gurnell J., Wauters L.A., Preatoni D., Tosi G.	2001	Spacing behaviour, kinship, and population dynamics of grey squirrels in a newly colonized broadleaf woodland in Italy	Canadian Journal of Zoology	79	1533	1543	10.1139/z01-109
Gurnell, J; Rushton, SP; Lurz, PWW; Sainsbury, AW; Nettleton, P; Shirley, MDF; Bruemmer, C; Geddes, N	2006	Squirrel poxvirus: Landscape scale strategies for managing disease threat	BIOLOGICAL CONSERVATION	131	287	295	10.1016/j.biocon.2006.04.009
Gurnell, J; Wauters, LA; Lurz, PWW; Tosi, G	2004	Alien species and interspecific competition: effects of introduced eastern grey squirrels on red squirrel population dynamics	JOURNAL OF ANIMAL ECOLOGY	73	26	35	10.1111/j.1365-2656.2004.00791.x
Hofmannova, L; Romeo, C; Stohanzlova, L; Jirsova, D; Mazzamuto, MV; Wauters, LA; Ferrari, N; Modry, D	2016	Diversity and host specificity of coccidia (Apicomplexa: Eimeriidae) in native and introduced squirrel species	EUROPEAN JOURNAL OF PROTISTOLOGY	56	1	14	10.1016/j.ejop.2016.04.008
Jones, H; White, A; Lurz, P; Shuttleworth, C	2017	Mathematical models for invasive species management: Grey squirrel control on Anglesey	ECOLOGICAL MODELLING	359	276	284	10.1016/j.ecolmodel.2017.05.020
Kenward R.E., Hodder K.H., Rose R.J., Walls C.A., Parish T., Holm J.L., Morris P.A., Walls S.S., Doyle F.I.	1998	Comparative demography of red squirrels (Sciurus vulgaris) and grey squirrels (Sciurus carolinensis) in deciduous and conifer woodland	Journal of Zoology	244	7	21	10.1017/S0952836998001022
Kenward R.E., Tonkin J.M.	1986	Red and Grey squirrels: some behavioural and biometric differences	Journal of Zoology	209	279	281	10.1111/j.1469-7998.1986.tb03583.x
Kenward, RE; Hodder, KH	1998	Red squirrels (Sciurus vulgaris) released in conifer woodland: the effects of source habitat, predation and interactions with grey squirrels (Sciurus carolinensis)	JOURNAL OF ZOOLOGY	244	23	32	10.1017/S0952836998001034
KENWARD, RE; HOLM, JL	1993	ON THE REPLACEMENT OF THE RED SQUIRREL IN BRITAIN - A PHYTOTOXIC EXPLANATION	PROCEEDINGS OF THE ROYAL SOCIETY B-BIOLOGICAL SCIENCES	251	187	194	10.1098/rspb.1993.0028
LaRose J.P., Meredith A.L., Everest D.J., Fiegna C., McInnes C.J., Shaw D.J., Milne E.M.	2010	Epidemiological and postmortem findings in 262 red squirrels (Sciurus vulgaris) in Scotland, 2005 to 2009	Veterinary Record	167	297	302	10.1136/vr.c4196
Lawton, Colin; Rochford, John;	2007	The recovery of grey squirrel (Sciurus carolinensis) populations after intensive control programmes	Biology and Environment: Proceedings of the Royal Irish Academy	107B	19	29
Lloyd, H	1983	Past and present distributions of red and grey squirrels	Mammal Review	13	69	80	10.1111/j.1365-2907.1983.tb00269.x
Lurz P.W.W., Geddes N., Lloyd A.J., Shirley M.D.F., Rushton S.P., Burlton B.	2003	Planning a red squirrel conservation area: Using a spatially explicit population dynamics model to predict the impact of felling and forest design plans	Forestry	76	95	108	10.1093/forestry/76.1.95
Lurz P.W.W., Rushton S.P., Wauters L.A., Bertolino S., Currado I., Mazzoglio P., Shirley M.D.F.	2001	Predicting grey squirrel expansion in North Italy: A spatially explicit modelling approach	Landscape Ecology	16	407	420	10.1023/A:1017508711713
Lurz, PWW; Lloyd, AJ	2000	Body weights in grey and red squirrels: do seasonal weight increases occur in conifer woodland?	JOURNAL OF ZOOLOGY	252	539	543	10.1111/j.1469-7998.2000.tb01237.x
Macdonald, Isabel MV;	1997	Field experiments on duration and precision of grey and red squirrel spatial memory	Animal Behaviour	54	879	891	10.1006/anbe.1996.0528
Martínez-Jiménez D., Graham D., Couper D., Benkö M., Schöniger S., Gurnell J., Sainsbury A.W.	2011	Epizootiology and pathologic findings associated with a newly described adenovirus in the red squirrel, Sciurus vulgaris	Journal of Wildlife Diseases	47	442	456	10.7589/0090-3558-47.2.442
Martinoli A., Bertolino S., Preatoni D.G., Balduzzi A., Marsan A., Genovesi P., Tosi G., Wauters L.A.	2010	Headcount 2010: The multiplication of the grey squirrel introduced in Italy [Headcount 2010: Il proliferare delle popolazioni di scoiattolo grigio introdotte in Italia]	Hystrix	21	127	136	10.4404/Hystrix-21.2-4463
McGowan N.E., Marks N.J., McInnes C.J., Deane D., Maule A.G., Scantlebury M.	2014	Effects of parasitism and morphology on squirrelpox virus seroprevalence in grey squirrels (Sciurus carolinensis)	PLoS ONE	9			10.1371/journal.pone.0083106
McInnes, Colin J; Coulter, L; Dagleish, MP; Deane, D; Gilray, J; Percival, A; Willoughby, K; Scantlebury, M; Marks, Nicola; Graham, D;	2013	The emergence of squirrelpox in Ireland	Animal Conservation	16	51	59	10.1111/j.1469-1795.2012.00570.x
McNicol, CM; Bavin, D; Bearhop, S; Ferryman, M; Gill, R; Goodwin, CED; MacPherson, J; Silk, MJ; McDonald, RA	2020	Translocated native pine martens Martes martes alter short-term space use by invasive non-native grey squirrels Sciurus carolinensis	JOURNAL OF APPLIED ECOLOGY	57	903	913	10.1111/1365-2664.13598
Okubo A., Maini P.K., Williamson M.H., Murray J.D.	1989	On the spatial spread of the grey squirrel in Britain	Proceedings - Royal Society of London, B	238	113	125	10.1098/rspb.1989.0070
O'Teangana D, Reilly S., Montgomery W.I., Rochford J.	2000a	Distribution and status of the Red Squirrel (Sciurus vulgaris) and Grey Squirrel (Sciurus carolinensis) in Ireland	Mammal Review	30	45	56	10.1046/j.1365-2907.2000.00054.x
O'Teangana D., Russ J.M., Mathers R.G., Montgomery W.I.	2000b	Habitat associations of the red squirrel Sciurus Vulgaris and grey squirrel S. carolinensis in Northern Ireland	Biology and Environment	100	27	33
Prediger J., Horčičková M., Hofmannová L., Sak B., Ferrari N., Mazzamuto M.V., Romeo C., Wauters L.A., McEvoy J., Kváč M.	2017	Native and introduced squirrels in Italy host different Cryptosporidium spp.	European Journal of Protistology	61	64	75	10.1016/j.ejop.2017.09.007
Roberts, MG; Heesterbeek, JAP	2021	Infection dynamics in ecosystems: on the interaction between red and grey squirrels, pox virus, pine martens and trees	JOURNAL OF THE ROYAL SOCIETY INTERFACE	18			10.1098/rsif.2021.0551
Romeo C., Pisanu B., Ferrari N., Basset F., Tillon L., Wauters L.A., Martinoli A., Saino N., Chapuis J.-L.	2013	Macroparasite community of the Eurasian red squirrel (Sciurus vulgaris): Poor species richness and diversity	Parasitology Research	112	3527	3536	10.1007/s00436-013-3535-8
Romeo C., Wauters L.A., Santicchia F., Dantzer B., Palme R., Martinoli A., Ferrari N.	2020	Complex relationships between physiological stress and endoparasite infections in natural populations	Current Zoology	66	449	457	10.1093/cz/zoaa029
Romeo, C; Ferrari, N; Lanfranchi, P; Saino, N; Santicchia, F; Martinoli, A; Wauters, LA	2015	Biodiversity threats from outside to inside: effects of alien grey squirrel (Sciurus carolinensis) on helminth community of native red squirrel (Sciurus vulgaris)	PARASITOLOGY RESEARCH	114	2621	2628	10.1007/s00436-015-4466-3
Romeo, C; McInnes, CJ; Dale, TD; Shuttleworth, C; Bertolino, S; Wauters, LA; Ferrari, N	2019	Disease, invasions and conservation: no evidence of squirrelpox virus in grey squirrels introduced to Italy	ANIMAL CONSERVATION	22	14	23	10.1111/acv.12433
Romeo, C; Piscitelli, AP; Santicchia, F; Martinoli, A; Ferrari, N; Wauters, LA	2021	Invading parasites: spillover of an alien nematode reduces survival in a native species	BIOLOGICAL INVASIONS	23	3847	3857	10.1007/s10530-021-02611-7
Romeo, C; Wauters, LA; Ferrari, N; Lanfranchi, P; Martinoli, A; Pisanu, B; Preatoni, DG; Saino, N	2014	Macroparasite Fauna of Alien Grey Squirrels (Sciurus carolinensis): Composition, Variability and Implications for Native Species	PLOS ONE	9			10.1371/journal.pone.0088002
Rushton S.P., Gurnell J., Lurz P.W.W., Fuller R.M.	2002	Modeling impacts and costs of gray squirrel control regimes on the viability of red squirrel populations	Journal of Wildlife Management	66	683	697	10.2307/3803135
Rushton, SP; Lurz, PWW; Fuller, R; Garson, PJ	1997	Modelling the distribution of the red and grey squirrel at the landscape scale: a combined GIS and population dynamics approach	JOURNAL OF APPLIED ECOLOGY	34	1137	1154	10.2307/2405227
Rushton, SP; Lurz, PWW; Gurnell, J; Fuller, R	2000	Modelling the spatial dynamics of parapoxvirus disease in red and grey squirrels: a possible cause of the decline in the red squirrel in the UK?	JOURNAL OF APPLIED ECOLOGY	37	997	1012	10.1046/j.1365-2664.2000.00553.x
Rushton, SP; Lurz, PWW; Gurnell, J; Nettleton, P; Bruemmer, C; Shirley, MDF; Sainsbury, AW	2006	Disease threats posed by alien species: the role of a poxvirus in the decline of the native red squirrel in Britain	EPIDEMIOLOGY AND INFECTION	134	521	533	10.1017/S0950268805005303
Sainsbury A.W., Nettleton P., Gilray J., Gurnell J.	2000	Grey squirrels have high seroprevalence to a parapoxvirus associated with deaths in red squirrels	Animal Conservation	3	229	233	10.1017/S1367943000000949
Sainsbury, AW; Deaville, R; Lawson, B; Cooley, WA; Farelly, SSJ; Stack, MJ; Duff, P; McInnes, CJ; Gurnell, J; Russell, PH; Rushton, SP; Pfeiffer, DU; Nettleton, P; Lurz, PWW	2008	Poxviral Disease in Red Squirrels Sciurus vulgaris in the UK: Spatial and Temporal Trends of an Emerging Threat	ECOHEALTH	5	305	316	10.1007/s10393-008-0191-z
Santicchia, F; Dantzer, B; van Kesteren, F; Palme, R; Martinoli, A; Ferrari, N; Wauters, LA	2018	Stress in biological invasions: Introduced invasive grey squirrels increase physiological stress in native Eurasian red squirrels	JOURNAL OF ANIMAL ECOLOGY	87	1342	1352	10.1111/1365-2656.12853
Santicchia, F; Romeo, C; Ferrari, N; Matthysen, E; Vanlauwe, L; Wauters, LA; Martinoli, A	2019	The price of being bold? Relationship between personality and endoparasitic infection in a tree squirrel	MAMMALIAN BIOLOGY	97	1	8	10.1016/j.mambio.2019.04.007
Santicchia, F; Wauters, LA; Piscitelli, AP; Van Dongen, S; Martinoli, A; Preatoni, D; Romeo, C; Ferrari, N	2020	Spillover of an alien parasite reduces expression of costly behaviour in native host species	JOURNAL OF ANIMAL ECOLOGY	89	1559	1569	10.1111/1365-2656.13219
Santicchia, F; Wauters, LA; Tranquillo, C; Villa, F; Dantzer, B; Palme, R; Preatoni, D; Martinoli, A	2022b	Invasive alien species as an environmental stressor and its effects on coping style in a native competitor, the Eurasian red squirrel	HORMONES AND BEHAVIOR	140			10.1016/j.yhbeh.2022.105127
Santicchia, F., Wauters, L.A., Dantzer, B., Palme, R., Tranquillo, C., Preatoni, D., Martinoli, A.	2022a	Native species exhibit physiological habituation to invaders: a reason for hope	PROCEEDINGS OF THE ROYAL SOCIETY B-BIOLOGICAL SCIENCES	289			https://doi.org/10.1098/rspb.2022.1022
Scapin, P; Ulbano, M; Ruggiero, C; Balduzzi, A; Marsan, A; Ferrari, N; Bertolino, S	2019	Surgical sterilization of male and female grey squirrels (Sciurus carolinensis) of an urban population introduced in Italy	JOURNAL OF VETERINARY MEDICAL SCIENCE	81	641	645	10.1292/jvms.18-0319
Schuchert P., Shuttleworth C.M., McInnes C.J., Everest D.J., Rushton S.P.	2014	Landscape scale impacts of culling upon a European grey squirrel population: can trapping reduce population size and decrease the threat of squirrelpox virus infection for the native red squirrel?	Biological Invasions	16	2381	2391	10.1007/s10530-014-0671-8
Sheehy E., O'Meara D.B., O'Reilly C., Smart A., Lawton C.	2014	A non-invasive approach to determining pine marten abundance and predation	European Journal of Wildlife Research	60	223	236	10.1007/s10344-013-0771-2
Sheehy, E; Lawton, C	2014	Population crash in an invasive species following the recovery of a native predator: the case of the American grey squirrel and the European pine marten in Ireland	BIODIVERSITY AND CONSERVATION	23	753	774	10.1007/s10531-014-0632-7
Sheehy, E; Sutherland, C; O'Reilly, C; Lambin, X	2018	The enemy of my enemy is my friend: native pine marten recovery reverses the decline of the red squirrel by suppressing grey squirrel populations	PROCEEDINGS OF THE ROYAL SOCIETY B-BIOLOGICAL SCIENCES	285			10.1098/rspb.2017.2603
Shuttleworth C.M., Everest D., Holmes P., Bell S., Cripps R.	2022	An opportunistic assessment of the impact of squirrelpox disease outbreaks upon a red squirrel population sympatric with grey squirrels in Wales	Animals	12			10.3390/ani12010099
Shuttleworth, CM; Everest, DJ; McInnes, CJ; Greenwood, A; Jackson, NL; Rushton, S; Kenward, RE	2014	Inter-specific viral infections: Can the management of captive red squirrel collections help inform scientific research?	HYSTRIX-ITALIAN JOURNAL OF MAMMALOGY	25	18	24	10.4404/hystrix-25.1-10126
Shuttleworth, CM; Robinson, N; Halliwell, EC; Clews-Roberts, R; Peek, H; Podgornik, G; Stinson, M; Rice, S; Finlay, C; McKinney, C; Everest, DJ; Larsen, KW	2020	Evolving grey squirrel management techniques in Europe	MANAGEMENT OF BIOLOGICAL INVASIONS	11	747	761	10.3391/mbi.2020.11.4.09
Signorile A.L., Reuman D.C., Lurz P.W.W., Bertolino S., Carbone C., Wang J.	2016	Using DNA profiling to investigate human-mediated translocations of an invasive species	Biological Conservation	195	97	105	10.1016/j.biocon.2015.12.026
Signorile A.L., Wang J., Lurz P.W.W., Bertolino S., Carbone C., Reuman D.C.	2014b	Do founder size, genetic diversity and structure influence rates of expansion of North American grey squirrels in Europe?	Diversity and Distributions	20	918	930	10.1111/ddi.12222
Signorile, AL; Paoloni, D; Reuman, DC	2014a	Grey squirrels in central Italy: a new threat for endemic red squirrel subspecies	BIOLOGICAL INVASIONS	16	2339	2350	10.1007/s10530-014-0668-3
Slade, A; White, A; Kortland, K; Lurz, PWW	2020	An assessment of long-term forest management policy options for red squirrel conservation in Scotland	HYSTRIX-ITALIAN JOURNAL OF MAMMALOGY	31	137	147	10.4404/hystrix-00351-2020
Slade, A; White, A; Kortland, K; Lurz, PWW	2021	Natural strongholds for red squirrel conservation in Scotland	NATURE CONSERVATION-BULGARIA		93	108	10.3897/natureconservation.43.62864
Strauss, A; White, A; Boots, M	2012	Invading with biological weapons: the importance of disease-mediated invasions	FUNCTIONAL ECOLOGY	26	1249	1261	10.1111/1365-2435.12011
Stritch C., Naulty F., Zintl A., Callanan J.J., McCullough M., Deane D., Marnell F., McMahon B.J.	2015	Squirrelpox virus reservoir expansion on the east coast of Ireland	European Journal of Wildlife Research	61	483	486	10.1007/s10344-015-0909-5
Tattoni, C; Preatoni, DG; Lurz, PWW; Rushton, SP; Tosi, G; Bertolino, S; Martinoli, A; Wauters, LA	2006	Modelling the expansion of a grey squirrel population: Implications for squirrel control	BIOLOGICAL INVASIONS	8	1605	1619	10.1007/s10530-005-3503-z
Tattoni, Clara; Preatoni, Damiano G; Lurz, Peter WW; Rushton, Steven P; Tosi, Guido; Wauters, LA; Bertolino, S;	2005	Using GRASS and Spatial Explicit Population dynamics Modelling as a conservation tool to manage grey squirrel (Sciurus carolinensis) in northern Italy	The Asian Journal of Geoinformatics	6	0	0
Tompkins, DM; Sainsbury, AW; Nettleton, P; Buxton, D; Gurnell, J	2002	Parapoxvirus causes a deleterious disease in red squirrels associated with UK population declines	PROCEEDINGS OF THE ROYAL SOCIETY B-BIOLOGICAL SCIENCES	269	529	533	10.1098/rspb.2001.1897
Tompkins, DM; White, AR; Boots, M	2003	Ecological replacement of native red squirrels by invasive greys driven by disease	ECOLOGY LETTERS	6	189	196	10.1046/j.1461-0248.2003.00417.x
Travaglia, E; La Morgia, V; Venturino, E	2020	POXVIRUS, RED AND GREY SQUIRREL DYNAMICS: IS THE RECOVERY OF A COMMON PREDATOR AFFECTING SYSTEM EQUILIBRIA? INSIGHTS FROM A PREDATOR-PREY ECOEPIDEMIC MODEL	DISCRETE AND CONTINUOUS DYNAMICAL SYSTEMS-SERIES B	25	2023	2040	10.3934/dcdsb.2019200
Twining, JP; Lawton, C.; White, A.; Sheehy, E;, Hobson, K; Montgomery, WI; Lambin, X	2022b	Restoring vertebrate predator populations can provide landscape‐scale biological control of established invasive vertebrates: Insights from pine marten recovery in Europe	Global Change Biology	28	5368	5384	10.1111/gcb.16236
Twining, JP; Montgomery, WI; Price, L; Kunc, HP; Tosh, DG	2020b	Native and invasive squirrels show different behavioural responses to scent of a shared native predator	ROYAL SOCIETY OPEN SCIENCE	7			10.1098/rsos.191841
Twining, JP; Montgomery, WI; Tosh, DG	2020a	The dynamics of pine marten predation on red and grey squirrels	MAMMALIAN BIOLOGY	100	285	293	10.1007/s42991-020-00031-z
Twining, JP; Montgomery, WI; Tosh, DG	2021	Declining invasive grey squirrel populations may persist in refugia as native predator recovery reverses squirrel species replacement	JOURNAL OF APPLIED ECOLOGY	58	248	260	10.1111/1365-2664.13660
Twining, JP; Sutherland, C; Reid, N; Tosh, DG	2022a	Habitat mediates coevolved but not novel species interactions	PROCEEDINGS OF THE ROYAL SOCIETY B-BIOLOGICAL SCIENCES	289			10.1098/rspb.2021.2338
Wauters, LA; Gurnell, J	1999	The mechanism of replacement of red squirrels by grey squirrels: A test of the interference competition hypothesis	ETHOLOGY	105	1053	1071	10.1046/j.1439-0310.1999.10512488.x
Wauters, LA; Gurnell, J; Currado, I; Mazzoglio, P	1997	Grey squirrel Sciurus carolinensis management in Italy - squirrel distribution in a highly fragmented landscape	Wildlife Biology	3	117	124	10.2981/wlb.1997.014
Wauters, LA; Gurnell, J; Martinoli, A; Tosi, G	2001	Does interspecific competition with introduced grey squirrels affect foraging and food choice of Eurasian red squirrels?	ANIMAL BEHAVIOUR	61	1079	1091	10.1006/anbe.2001.1703
Wauters, LA; Gurnell, J; Martinoli, A; Tosi, G	2002	Interspecific competition between native Eurasian red squirrels and alien grey squirrels: does resource partitioning occur?	BEHAVIORAL ECOLOGY AND SOCIOBIOLOGY	52	332	341	10.1007/s00265-002-0516-9
Wauters, LA; Lurz, PWW; Gurnell, J	2000	Interspecific effects of grey squirrels (Sciurus carolinensis) on the space use and population demography of red squirrels (Sciurus vulgaris) in conifer plantations	ECOLOGICAL RESEARCH	15	271	284	10.1046/j.1440-1703.2000.00354.x
Wauters, LA; Mazzamuto, MV; Santicchia, F; Van Dongen, S; Preatoni, DG; Martinoli, A	2019	Interspecific competition affects the expression of personality-traits in natural populations	SCIENTIFIC REPORTS	9			10.1038/s41598-019-47694-4
Wauters, LA; Tosi, G; Gurnell, J	2002	Interspecific competition in tree squirrels: do introduced grey squirrels (Sciurus carolinensis) deplete tree seeds hoarded by red squirrels (S-vulgaris)?	BEHAVIORAL ECOLOGY AND SOCIOBIOLOGY	51	360	367	10.1007/s00265-001-0446-y
White, A; Bell, SS; Lurz, PWW; Boots, M	2014	Conservation management within strongholds in the face of disease-mediated invasions: red and grey squirrels as a case study	JOURNAL OF APPLIED ECOLOGY	51	1631	1642	10.1111/1365-2664.12274
White, A; Lurz, PWW; Bryce, J; Tonkin, M; Ramoo, K; Bamforth, L; Jarrott, A; Boots, M	2016	Modelling disease spread in real landscapes: Squirrelpox spread in Southern Scotland as a case study	HYSTRIX-ITALIAN JOURNAL OF MAMMALOGY	27	75	82	10.4404/hystrix-27.1-11657
Yoder, CA; Mayle, BA; Furcolow, CA; Cowan, DP; Fagerstone, KA	2011	Feeding of grey squirrels (Sciurus carolinensis) with the contraceptive agent DiazaCon (TM): effect on cholesterol, hematology, and blood chemistry	INTEGRATIVE ZOOLOGY	6	409	419	10.1111/j.1749-4877.2011.00247.x
Slade. A., White, A., Lurz, P.W.W., Shuttleworth, S., Tosh, D.G., Twining, J.P.	2022a	Indirect effects of pine marten recovery result in benefits to native prey through suppression of an invasive species and a shared pathogen	Ecological Modelling	476	110216		10.1016/j.ecolmodel.2022.110216
Slade, A., White, A., Lurz, P.W.W., Shuttleworth, C., Lambin, X.	2022b	A temporal refuge from predation can change the outcome of prey species competition	OIKOS	e08565	1	16	10.1111/oik.08565
Bertolino, S., Martinoli, A., Paoloni, D., Marsan, A., Wauters, L.A.	2015	The grey squirrel in Italy: impacts and management (book chapter)	Red Squirrels: Ecology, Conservation and Management in Europe		163	173
Bertolino, S., Lurz, P., Shuttleworth, C., Martinoli, A., Wauters, L.A.	2016	(book chapterThe management of grey squirrel populations in Europe: evolving best practice (book chapter)	The Grey Squirrel: Ecology and Management of an Invasive Species in Europe		495	514
Derbridge, J., Pepper, H., Koprowski, J.	2016	Economic damage by invasive grey squirrels in Europe (book chapter)	The Grey Squirrel: Ecology and Management of an Invasive Species in Europe		393	405
Gurnell, J.	1987	The Natural History of Squirrels (book)	Croom Helm, London
Gurnell, J., Pepper, H.	2016	The control and management of grey squirrel populations in Britain (book chapter)	The Grey Squirrel: Ecology and Management of an Invasive Species in Europe		407	436
Gurnell, J., Lurz, P.W.W., Wauters, L.A.	2015	Years of interactions and conflict in Europe: competition between Eurasian red squirrels and North American grey squirrels (book chapter)	Red Squirrels: Ecology, Conservation and Management in Europe		19	37
Halliwell, E., Shuttleworth, C., Cartmel, S., Lloyd, I., Jenkins, R.	2016	Experiences of grey squirrel management in an upland conifer forest (book chapter)	The Grey Squirrel: Ecology and Management of an Invasive Species in Europe		453	472
Larsen, K.	2016	Grey squirrels in Western Canada: history repeats itself (again, and again) (book chapter)	The Grey Squirrel: Ecology and Management of an Invasive Species in Europe		19	34
Merrick, M., Evans, K., Bertolino, S.	2016	Urban grey squirrel ecology, associated impacts, and management challenges (book chapter)	The Grey Squirrel: Ecology and Management of an Invasive Species in Europe		57	77
McInnes, C., Deane, D., Fiegna, C.	2015	Squirrelpox virus: origins and the potential for its control (book chapter)	Red Squirrels: Ecology, Conservation and Management in Europe		251	264
Nichols, C., Gill, R.	2016	Bark stripping behaviour by the grey squirrel, Sciurus carolinensis (book chapter)	The Grey Squirrel: Ecology and Management of an Invasive Species in Europe		369	390
Sewrad, A., O'hare, S.	2015	The importance of community support and participation for regional red squirrel conservation: a case study from northern England (book chapter)	Red Squirrels: Ecology, Conservation and Management in Europe		299	316
Shuttleworth, C., Halliwell, E., Robertson, P.	2016	Identifying incursion pathways, early detection responses and management actions to prevent grey squirrel range expansion: an island case study in Wales	The Grey Squirrel: Ecology and Management of an Invasive Species in Europe		475	492
Gurnell, J. And Pepper, H.	1993	A critical look at conserving the British red squirrel Sciurus vulgaris	Mammal Review	25	125	136	10.1111/j.1365-2907.1993.tb00424.x
Gurnell, J., Blackett, T., Butler, H., Lurz, P., Magris, L., Shuttleworth, C.	2015	British red squirrel strongholds: challenges for conservation (book chapter)	Red Squirrels: Ecology, Conservation and Management in Europe		211	231
